# Supplementary material for: Renal outcomes and all‐cause death associated with sodium‐glucose co‐transporter‐2 inhibitors versus other glucose‐lowering drugs (CVD‐REAL 3 Korea)
Source: PubMed Central journal article supplement — Diabetes Obes Metab. 2020 Nov 24;23(2):455–66. doi: 10.1111/dom.14239 (PMC7839503; doi:10.1111/dom.14239), 2020-11-24
Supplement: DOM-23-455-s002.pdf [file DOM-23-455-s002.pdf]

**ESRD, On-treatment**

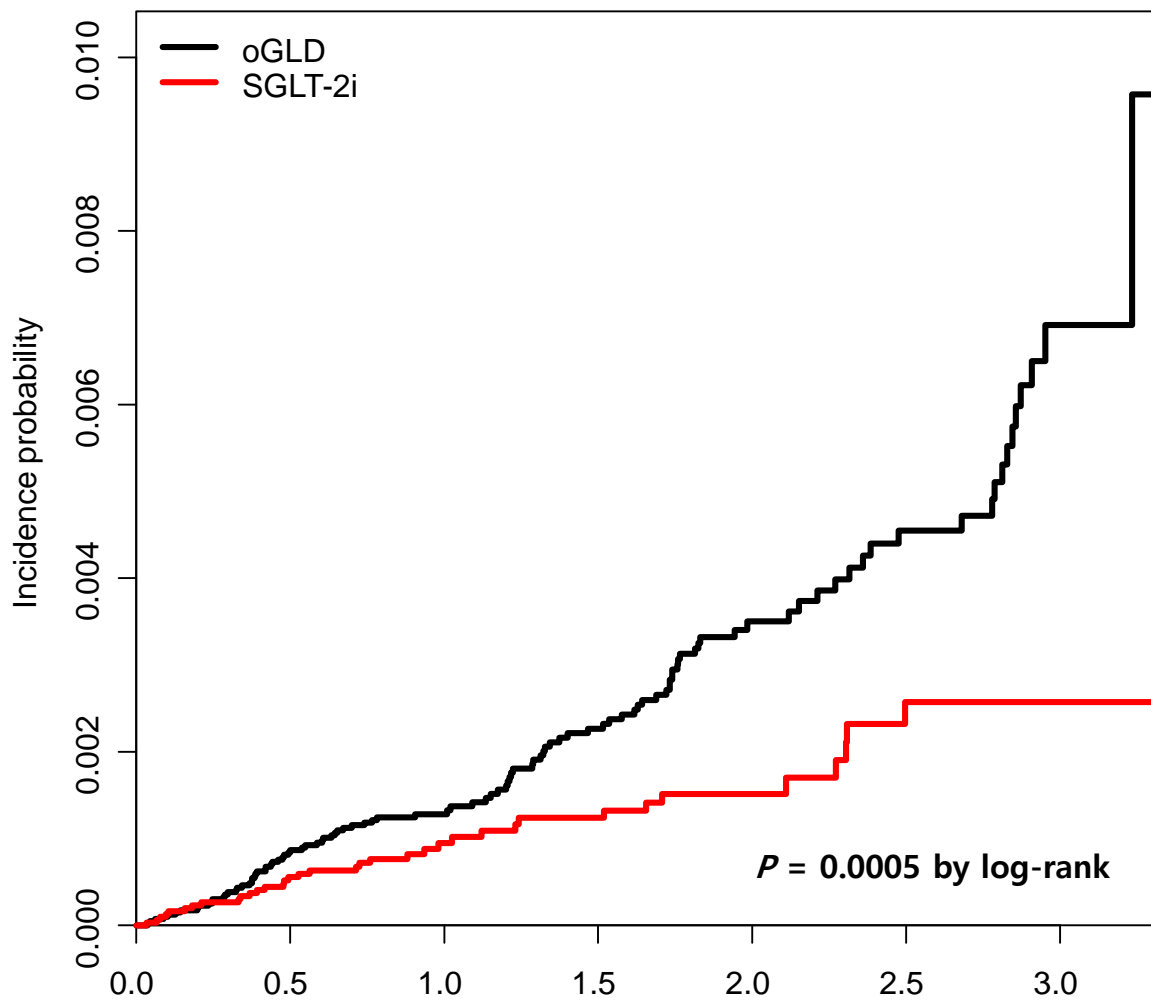

|         | Number at risk |        |       |       |
|---------|----------------|--------|-------|-------|
|         | 0              | 1      | 2     | 3     |
| oGLD    | 40,673         | 21,886 | 9,427 | 1,255 |
| SGLT-2i | 30,527         | 14,312 | 5,572 | 690   |

**All-Cause Death, On-treatment**

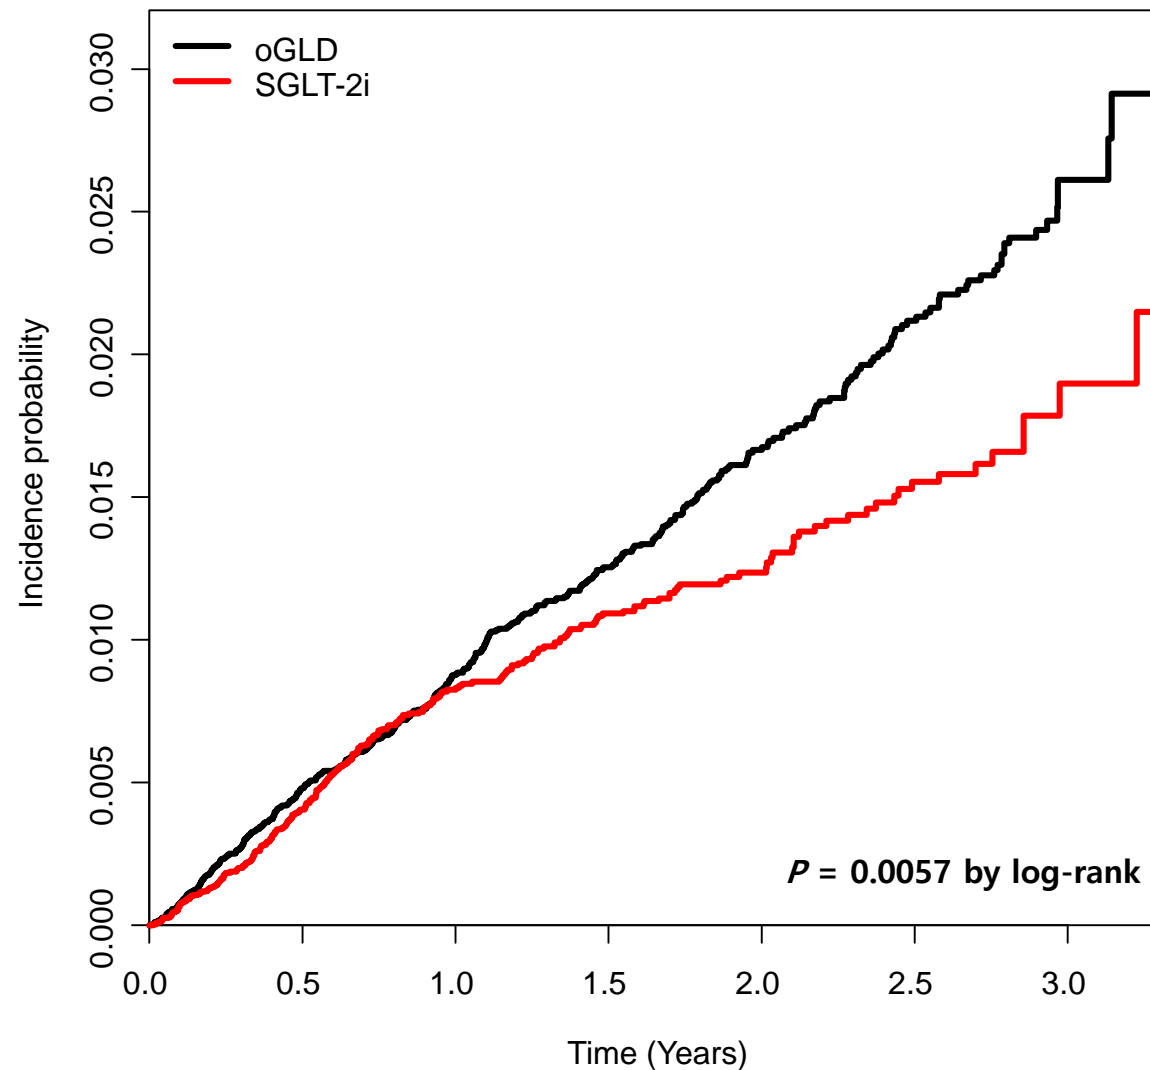

|         | Number at risk |        |       |       |
|---------|----------------|--------|-------|-------|
|         | 0              | 1      | 2     | 3     |
| oGLD    | 40,673         | 21,894 | 9,438 | 1,258 |
| SGLT-2i | 30,527         | 14,325 | 5,582 | 691   |
