# Supplementary figures and images for: Renal outcomes and all‐cause death associated with sodium‐glucose co‐transporter‐2 inhibitors versus other glucose‐lowering drugs (CVD‐REAL 3 Korea)
Source: PubMed Central journal article supplement — Diabetes Obes Metab. 2020 Nov 24;23(2):455–66. doi: 10.1111/dom.14239 (PMC7839503; doi:10.1111/dom.14239), 2020-11-24

### ESRD

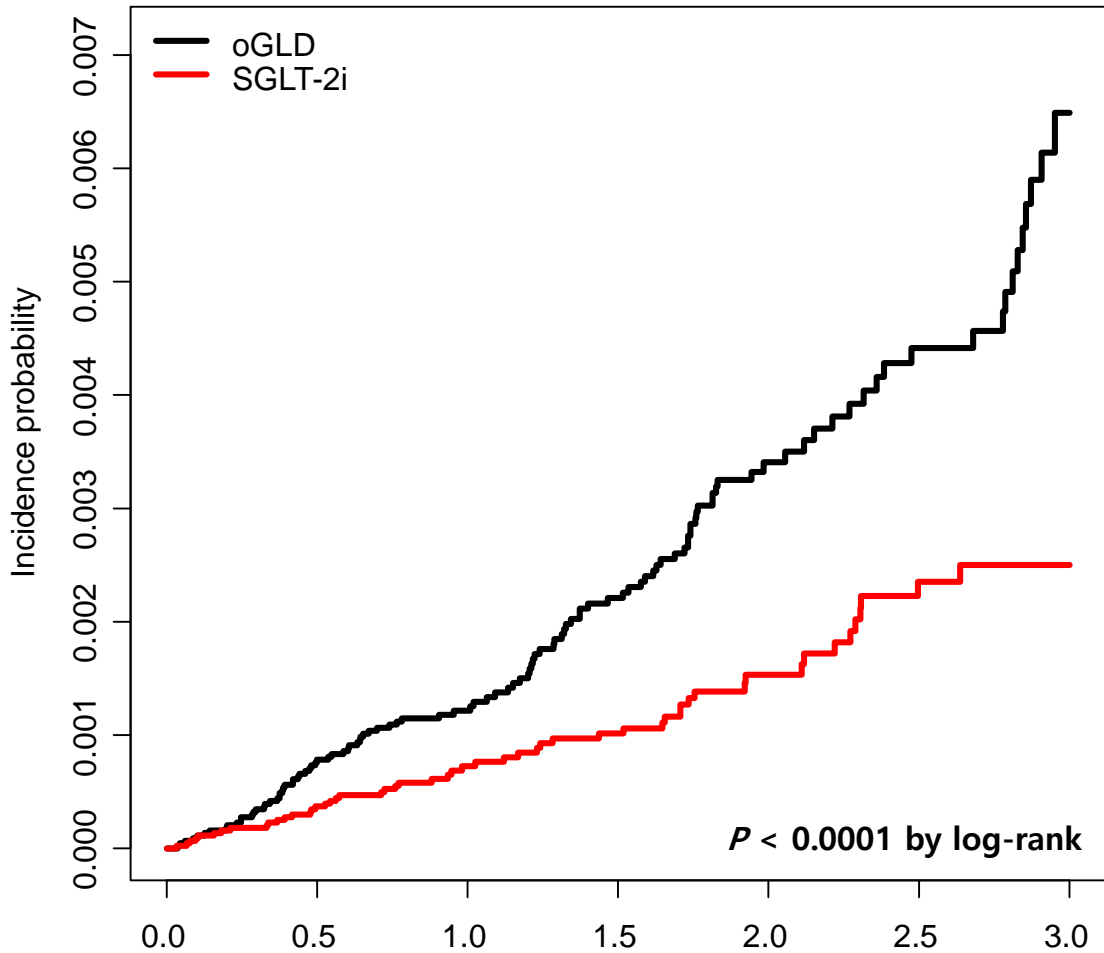

|         | Number at risk |       |       |      |
|---------|----------------|-------|-------|------|
|         | 0              | 1     | 2     | 3    |
| oGLD    | 45016          | 25141 | 11025 | 1587 |
| SGLT-2i | 45016          | 25217 | 11081 | 1578 |

### All-Cause Death

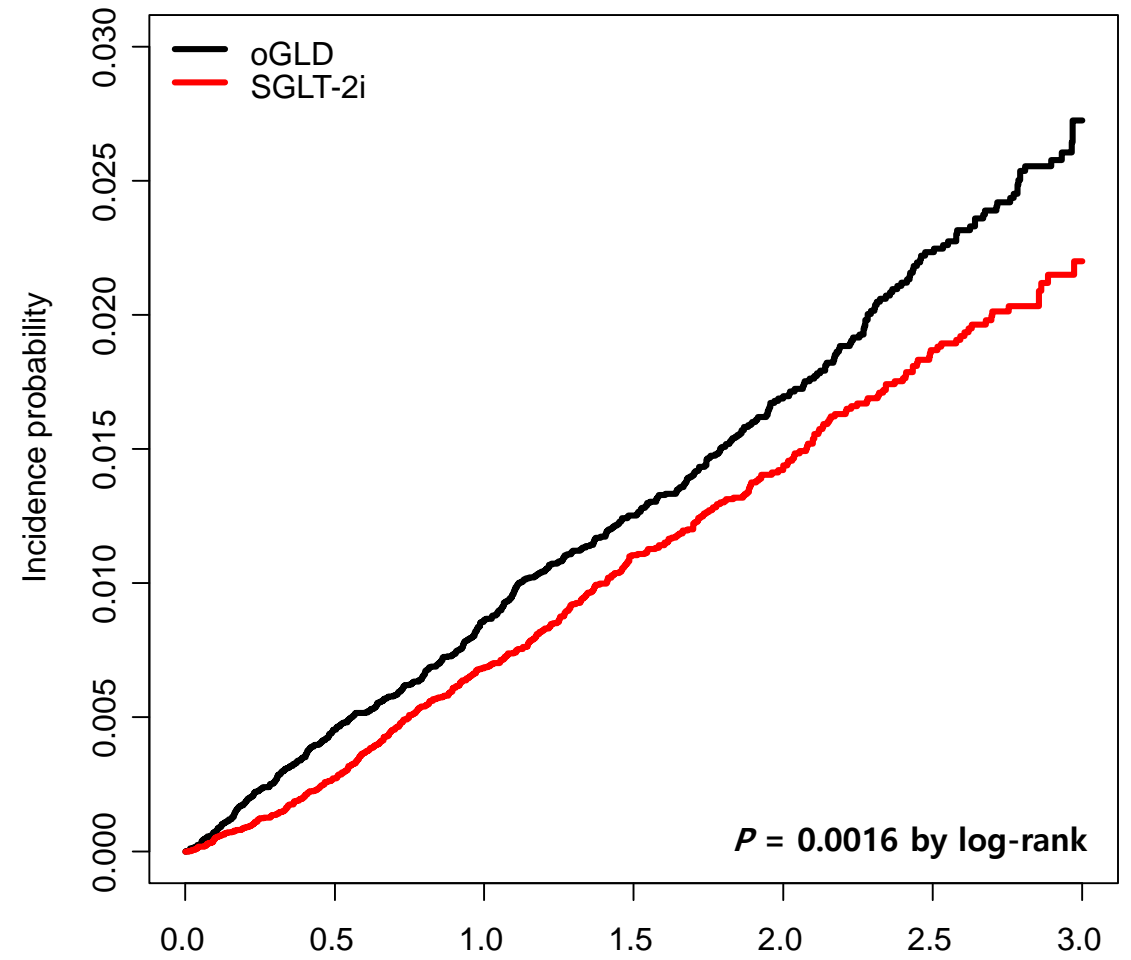

|         | Number at risk |       |       |      |
|---------|----------------|-------|-------|------|
|         | 0              | 1     | 2     | 3    |
| oGLD    | 45016          | 25150 | 11038 | 1591 |
| SGLT-2i | 45016          | 25232 | 11095 | 1581 |

Supplement: DOM-23-455-s001.pdf [file DOM-23-455-s001.pdf]
